# Supplementary material for: Long-chain fatty acids alter transcription of Helicobacter pylori virulence and regulatory genes
Source: PeerJ. 2021 Nov 1;9:e12270. doi: 10.7717/peerj.12270 (PMC8567857; doi:10.7717/peerj.12270)
Supplement: Supplemental Information 1 [file peerj-09-12270-s001.xlsx]

## Sheet: RAW DATA GENE EXPRESSION
	Gene expression
Gene	Condition
cagA	Control	Palmitic	Stearic	Oleic	Linoleic	Linolenic
	0.749577	1.16002	1.00985	1.72208	0.436529	0.564149
	1.08234	1.08986	0.639115	1.34178	0.34969	0.46786
	1.16809	1.06743	0.942228	2.14972	0.32178	0.421659
	0.900001	1.67376	1.25971	1.41725	0.523327	0.689751
	1.02133	1.52954	0.808374	1.25101	0.437024	0.697325
	1.07867	1.70893	0.94809	1.22527	0.342882	0.643561
	1.12098	1.56743	0.933333	1.56457	0.833982	0.662366
	0.980123	1.77658	0.945656	1.21298	0.823876	0.458879
	0.898899	1.07897	0.938778	1.35898	0.814481	0.618755
Mean	1	1.40584	0.936127	1.47151	0.542619	0.580478
Std Dev	0.132117	0.300861	0.163923	0.304126	0.219821	0.10648
	Gene expression
Gene	Condition
cagM	Control	Palmitic	Stearic	Oleic	Linoleic	Linolenic
	1.17501	5.179	0.540615	3.48866	2.75618	4.41579
	0.928306	5.10769	0.421228	3.39326	3.41686	3.76506
	0.896684	5.43648	0.494031	3.07945	3.01607	3.16602
	1.03404	2.67268	0.701389	3.52662	3.77974	5.05702
	1.03404	2.18599	0.863512	2.96552	4.16492	5.0922
	0.931926	2.78618	0.978259	4.43301	3.33639	5.02209
	0.991299	4.44547	0.656612	3.55551	3.89767	4.56761
	0.892298	4.89761	0.677789	3.02341	3.09878	4.909
	1.1164	2.32692	0.675599	3.71108	3.24355	4.02339
Mean	1	3.89311	0.66767	3.46406	3.41224	4.44646
Std Dev	0.0991328	1.36504	0.174381	0.448389	0.455119	0.673932
	Gene expression
Gene	Condition
cagL	Control	Palmitic	Stearic	Oleic	Linoleic	Linolenic
	0.910312	10.811	0.661784	3.01976	0.106907	1.75861
	0.92944	9.09096	0.60476	2.24145	0.224445	1.5416
	1.16025	8.48217	0.584159	2.5393	0.249037	1.58495
	1.10329	3.84186	0.841949	2.41464	0.0749361	3.43856
	0.902379	3.25308	0.973873	1.92093	0.0652357	3.41481
	0.994336	1.47612	0.896146	1.30297	0.0666064	3.34453
	1.2121	6.00123	0.801232	2.54121	0.220023	2.56767
	0.902134	6.27887	0.812098	2.3201	0.2324	2.45451
	0.885766	6.3199	0.78667	2.43065	0.247577	2.77782
Mean	1	6.1728	0.77363	2.30345	0.165241	2.54256
Std Dev	0.12577	2.98834	0.131868	0.475026	0.0837445	0.774923
	Gene expression
Gene	Condition
flaA	Control	Palmitic	Stearic	Oleic	Linoleic	Linolenic
	1.06305	0.931871	0.772819	1.29972	0.38109	0.998755
	0.851573	1.0127	0.721066	1.17952	0.428748	0.919042
	1.08538	1.02683	0.68217	1.13934	1.04117	0.94488
	0.836831	0.915739	0.860357	1.56158	0.961266	1.1591
	1.06659	1.80626	1.37841	1.61665	0.813948	1.12741
	1.09658	1.56158	1.41717	1.42702	0.728503	1.10421
	1.0202	1.23232	1.099	1.40089	0.727721	1.109
	1.12098	1.20454	1.00032	1.34092	0.77238	1.23232
	0.858818	1.19313	0.98209	1.499	0.75	1.00981
Mean	1	1.20944	0.990378	1.38496	0.733869	1.06717
Std Dev	0.116543	0.299243	0.268431	0.16265	0.215614	0.104489
	Gene expression
Gene	Condition
flaB	Control	Palmitic	Stearic	Oleic	Linoleic	Linolenic
	1.16721	34.6088	0.836866	3.84523	0.703718	1.08153
	1.10425	28.7018	0.836866	2.77612	0.371921	0.860394
	0.728534	32.9697	0.928561	3.2111	0.274156	1.02319
	0.840636	9.57687	0.823336	1.99938	0.562355	0.161494
	1.28303	10.7001	0.992785	2.24942	0.348578	0.220608
	0.876335	10.6262	1.34682	2.54833	0.309831	0.295157
	1.02	30.2389	1.00023	2.89172	0.821212	0.966109
	1.00012	29.0233	1.00112	2.77819	0.844421	0.87888
	0.97988	28.2121	1.1281	2.10291	0.771677	0.922982
Mean	1	23.8509	0.988298	2.71138	0.55643	0.71226
Std Dev	0.171071	10.3717	0.167724	0.580267	0.234212	0.372596
	Gene expression
Gene	Condition
sabA	Control	Palmitic	Stearic	Oleic	Linoleic	Linolenic
	1.11116	12.4846	1.94811	16.588	3.61018	5.78402
	0.921511	12.6588	1.80509	16.9366	3.51146	5.03528
	0.967325	13.5674	1.83029	18.4056	3.61018	5.17684
	0.824384	16.1268	2.23673	13.099	3.73573	4.99813
	1.08027	16.1268	2.1907	12.1374	4.14505	2.16054
	1.09535	17.5256	2.60519	17.7702	4.29122	4.44255
	0.99999	15.0021	0.458989	15.0924	1.00232	0.999122
	1.00021	14.7898	0.509092	13.0979	1.12091	1.50012
	0.999798	15.12	0.392189	17.2288	1.21089	0.940909
Mean	1	14.8224	1.55293	15.5951	2.91533	3.44861
Std Dev	0.0908027	1.67904	0.859642	2.31191	1.37768	2.00286
	Gene expression
Gene	Condition
babA	Control	Palmitic	Stearic	Oleic	Linoleic	Linolenic
	0.922982	1.08251	0.831838	1.65219	0.23235	0.879268
	1.02411	1.09004	0.837624	1.29628	0.192693	0.803503
	1.0529	1.02411	0.820386	1.26083	0.278235	0.776133
	1.09912	1.47055	1.25384	1.41064	0.553384	0.83298
	0.970199	1.73671	1.21113	1.30709	0.530841	0.892765
	0.930677	1.42046	0.777197	1.12222	0.527175	0.850482
	1.1002	1.30203	1.20036	1.32909	0.423839	0.812134
	0.902121	1.31569	0.99034	1.29872	0.391217	0.835324
	0.997679	1.27238	0.992389	1.20082	0.385625	0.850022
Mean	1	1.30161	0.990568	1.31976	0.390595	0.836957
Std Dev	0.074546	0.224388	0.188763	0.148597	0.133597	0.0365922
	Gene expression
Gene	Condition
hopQ	Control	Palmitic	Stearic	Oleic	Linoleic	Linolenic
	1.05131	1.02968	0.764289	1.1993	0.75901	1.23302
	0.994602	1.0155	0.769606	1.24159	0.748561	1.11898
	0.954086	1.06599	0.785777	1.33071	0.713107	1.09596
	1.04658	1.03265	0.751645	1.19885	0.769562	1.22565
	0.932548	1.0055	0.797878	1.20254	0.753215	1.09312
	1.02087	1.07599	0.770149	1.3702	0.697901	1.12919
	1	1.05645	0.798923	1.25899	0.752218	1.12229
	0.909989	1.00002	0.772178	1.25745	0.741939	1.12879
	1.09001	1.03777	0.772212	1.23898	0.732109	1.14576
Mean	1	1.03551	0.775851	1.2554	0.740847	1.14364
Std Dev	0.0592973	0.0264899	0.0155478	0.0596513	0.0228792	0.0512793
	Gene expression
Gene	Condition
mraY	Control	Palmitic	Stearic	Oleic	Linoleic	Linolenic
	1.20246	16.9826	1.58666	6.17307	1.58666	3.26253
	0.89254	16.5182	1.34349	6.21601	1.00416	2.52448
	0.905	18.3282	1.554	6.04603	1.08372	3.12962
	1.11619	8.74573	2.04001	5.34644	1.1963	0.677634
	0.932114	8.38946	2.08288	5.77003	0.932114	0.751882
	0.9517	7.50878	2.11195	4.81848	0.894143	0.659104
	0.992878	15.0304	1.7865	5.38436	1.00303	2.0891
	0.997899	13.0792	1.88203	5.00279	1.22009	1.7207
	1.00922	12.9999	1.77569	5.6792	0.902181	1.87062
Mean	1	13.0647	1.79591	5.60405	1.09138	1.85396
Std Dev	0.101331	4.03468	0.263799	0.502506	0.220343	1.00997
	Gene expression
Gene	Condition
pbp1	Control	Palmitic	Stearic	Oleic	Linoleic	Linolenic
	1.04906	1.45306	0.863994	1.63478	1.02747	1.23893
	0.985613	1.64615	0.852099	1.53591	0.958662	1.20505
	0.965329	1.49391	0.811742	1.53591	1.0711	1.15596
	1.01068	1.60807	1.12142	1.4695	0.923591	1.10598
	1.04632	1.49002	1.04632	1.38063	0.765952	1.03192
	0.942998	1.54256	1.01068	1.43926	0.760661	0.983043
	1.09893	1.16415	0.900001	0.931926	1.05861	1.0023
	0.988822	1.17852	1.02133	0.991299	1.0416	1.00898
	0.912249	1.12166	1.00029	0.892298	1.08495	1.0003
Mean	1	1.4109	0.958653	1.31239	0.965844	1.08138
Std Dev	0.0580267	0.201564	0.104812	0.290177	0.126145	0.0977688
	Gene expression
Gene	Condition
waaL	Control	Palmitic	Stearic	Oleic	Linoleic	Linolenic
	0.988445	1.72098	0.897033	1.88326	1.19188	1.22538
	0.99532	1.83176	0.872504	1.81911	1.20851	1.25113
	1.01623	1.79407	0.903272	1.78167	0.922252	0.890837
	0.981539	2.01827	1.25973	2.03231	0.563746	0.608411
	1.02322	1.79392	1.20842	1.8064	0.583626	0.571616
	0.995241	1.84436	1.26849	1.89621	0.544543	0.591774
	1.0202	1.20892	1.03404	1.78662	1.0023	1.02318
	0.897821	1.20121	1.03404	1.71106	1.00211	0.90213
	1.08198	1.1921	0.931926	1.78221	1.00012	0.76219
Mean	1	1.62284	1.04549	1.83321	0.89101	0.869628
Std Dev	0.0485934	0.326331	0.161061	0.0931246	0.262337	0.260524
	Gene expression
Gene	Condition
vacA	Control	Palmitic	Stearic	Oleic	Linoleic	Linolenic
	0.988445	1.72098	0.897033	1.88326	1.19188	1.22538
	0.99532	1.83176	0.872504	1.81911	1.20851	1.25113
	1.01623	1.79407	0.903272	1.78167	0.922252	0.890837
	0.981539	2.01827	1.25973	2.03231	0.563746	0.608411
	1.02322	1.79392	1.20842	1.8064	0.583626	0.571616
	0.995241	1.84436	1.26849	1.89621	0.544543	0.591774
	1.10329	2.19219	1.16025	2.892	0.835957	0.867271
	0.902379	2.54222	1.10329	1.98281	0.875783	0.893289
	0.994336	2.42428	0.902379	2.2121	0.856525	0.919191
Mean	1	2.01801	1.06393	2.03399	0.842536	0.868767
Std Dev	0.051903	0.300755	0.168929	0.348903	0.249308	0.252443
	Gene expression
Gene	Condition
ureA	Control	Palmitic	Stearic	Oleic	Linoleic	Linolenic
	1.04906	1.09361	0.806135	1.23893	1.07041	1.10887
	0.965329	0.999372	0.767955	1.36518	0.951423	0.913257
	0.985613	0.900684	0.767955	1.36518	0.978171	0.852099
	0.800567	1.32699	1.14723	1.20427	0.431717	0.565719
	0.731583	1.28179	1.1005	1.35487	0.402806	0.645352
	1.46785	1.55634	1.31783	1.57807	0.422833	0.573616
	1.00028	0.961329	1.0101	1.37096	0.776486	0.789292
	1.00121	0.980596	1.97121	1.32074	0.893218	0.772989
	0.998506	0.532582	1.00291	1.32184	0.721202	0.701219
Mean	1	1.07037	1.09909	1.34667	0.738696	0.769157
Std Dev	0.204489	0.293739	0.376339	0.104918	0.261025	0.174297
	Gene expression
Gene	Condition
ureB	Control	Palmitic	Stearic	Oleic	Linoleic	Linolenic
	1.03724	1.25941	0.934811	1.55051	0.698701	0.693874
	0.994985	1.32202	0.87221	1.67336	0.638495	0.647408
	0.967777	1.28587	1.03724	1.5398	0.571469	0.587535
	0.965644	1.8655	1.45353	1.70475	0.332071	0.406003
	1.01365	2.54835	1.31	1.59059	0.314158	0.392173
	1.0207	1.91795	1.38469	1.55786	0.28118	0.392173
	0.900001	1.69985	1.10232	1.60202	0.501012	0.819861
	1.02133	1.66211	1.09892	1.59919	0.50229	0.89231
	1.07867	1.68672	1.1564	1.66002	0.498922	0.9021
Mean	1	1.6942	1.15001	1.60868	0.482033	0.637049
Std Dev	0.0510992	0.403793	0.198092	0.058332	0.146412	0.208545
	Gene expression
Gene	Condition
nikR	Control	Palmitic	Stearic	Oleic	Linoleic	Linolenic
	0.951348	8.43463	1.30706	11.2849	0.538241	1.16985
	1.03266	8.20398	0.97018	14.4834	0.73018	1.15375
	1.01599	7.24168	1.62037	11.7642	0.671903	1.15375
	0.942132	8.15152	1.29586	14.9865	0.511452	1.17021
	1.01556	8.657	0.956567	11.7254	0.722659	1.15353
	1.0423	8.59891	1.02301	12.0911	0.734887	1.1716
	1.00029	8.12641	1.30204	13	0.712718	1.15212
	1.00239	8.20982	1.29896	12.7123	0.782102	1.16091
	0.997316	8.20202	1.22092	12.0293	0.608112	1.18099
Mean	1	8.20289	1.22166	12.6752	0.668028	1.16297
Std Dev	0.0336955	0.410671	0.211301	1.28169	0.0944015	0.0104902
	Gene expression
Gene	Condition
fur	Control	Palmitic	Stearic	Oleic	Linoleic	Linolenic
	0.993265	3.84725	4.23931	2.99764	0.276208	0.556259
	1.02659	3.37252	4.0949	3.46734	0.264957	0.474286
	0.980145	4.48102	5.2555	3.5402	0.212249	0.439468
	0.979898	3.33266	4.09212	2.86965	0.263216	0.446598
	1.01597	4.50125	5.38624	3.59363	0.201323	0.472326
	1.00413	4.32999	5.33637	3.25292	0.214342	0.493622
	1.12909	3.97745	4.73407	3.2869	0.20202	0.500129
	1.00021	3.73407	4.2869	3.23872	0.233232	0.483241
	0.870696	4.76178	4.48043	3.7899	0.255551	0.509091
Mean	1	4.03756	4.6562	3.33743	0.2359	0.486113
Std Dev	0.0663392	0.511466	0.540269	0.29199	0.0295297	0.0349584
	Gene expression
Gene	Condition
cheY	Control	Palmitic	Stearic	Oleic	Linoleic	Linolenic
	0.885192	8.8401	2.10535	9.02585	0.60881	0.961969
	1.10501	11.9925	2.36865	7.58981	0.675516	1.25185
	1.00979	9.60684	1.92394	7.74928	0.634663	1.20086
	0.845695	8.86596	2.09993	9.02	0.59633	0.986532
	1.09653	11.9	2.40025	7.60002	0.681	1.24996
	1.05777	10.9992	2.51121	8.02098	0.721209	1.20099
	1.09214	10.3674	2.16766	8.65292	0.621292	1.1201
	0.983218	10.2349	2.22528	8.23698	0.652991	1.13889
	0.924644	10.1677	2.09129	8.77191	0.642027	1.124
Mean	1	10.3305	2.2104	8.29642	0.648204	1.13724
Std Dev	0.0969666	1.15106	0.184766	0.588626	0.039311	0.104796
	Gene expression
Gene	Condition
hrcA	Control	Palmitic	Stearic	Oleic	Linoleic	Linolenic
	1.01912	1.07723	1.51291	0.805147	0.336184	0.0598429
	1.0624	1.08472	1.56626	0.799585	0.386174	0.408193
	0.918482	1.09227	1.56626	0.686496	0.386174	0.405374
	1.00999	1.08	1.52	0.796654	0.340004	0.06
	1.07012	1.07902	1.55214	0.79853	0.379994	0.412303
	0.919886	1.09021	1.54141	0.782827	0.360756	0.40242
	1.0129	1.00293	1.55002	0.778207	0.300212	0.271177
	1.00827	1.0001	1.55023	0.770218	0.302312	0.229817
	0.978831	1.00219	1.58881	0.784881	0.228976	0.219821
Mean	1	1.05652	1.54978	0.778061	0.335643	0.274327
Std Dev	0.0536448	0.0413845	0.0234218	0.0361878	0.0518024	0.144672
	Gene expression
Gene	Condition
arsR	Control	Palmitic	Stearic	Oleic	Linoleic	Linolenic
	1.02688	4.22299	1.7879	6.31273	4.75111	5.27168
	1.04121	4.10751	1.76328	6.05557	4.46377	5.12753
	0.931911	3.70189	1.56728	5.38245	4.46377	5.05694
	1.02	4.219	1.76532	6.2999	4.75	5.26596
	1.05	4.15214	1.78214	6.05001	4.47003	5.13333
	0.930003	4.08071	1.73318	6.02013	4.57974	5.17109
	1.01	4.2102	1.73318	6.57974	4.17109	5.58919
	0.959544	4.73318	1.07621	6.13949	4.84231	5.98121
	1.03045	4.8349	1.92013	6.13046	4.51711	5.88281
Mean	1	4.25139	1.68096	6.10783	4.55655	5.38664
Std Dev	0.0467981	0.342379	0.244148	0.324619	0.20381	0.345503
	Gene expression
Gene	Condition
flgR	Control	Palmitic	Stearic	Oleic	Linoleic	Linolenic
	0.938305	4.05058	2.42524	4.16446	1.39294	3.06977
	1.06299	4.13569	2.78587	4.46336	1.58901	3.38259
	0.998704	4.07876	2.74752	4.75066	1.4321	2.92438
	0.94	4.07512	2.41999	4.15933	1.3895	3.05977
	1.05966	4.14327	2.80001	4.45967	1.57965	3.28259
	1.00034	4.09668	2.39949	4.59635	1.4323	3.46925
	1.00291	4.36341	2.097	4.74053	1.1602	3.21224
	0.981212	4.10613	2.52502	5.47634	1.4251	3.20001
	1.01588	4.25019	2.24293	5.41964	1.13274	3.17944
Mean	1	4.14443	2.49368	4.69226	1.39261	3.19778
Std Dev	0.0440856	0.100553	0.245928	0.478001	0.157841	0.167995
	Gene expression
Gene	Condition
hspR	Control	Palmitic	Stearic	Oleic	Linoleic	Linolenic
	1.00461	3.72344	2.54318	4.55243	1.50174	2.92135
	0.99078	4.27711	2.52562	4.98169	1.44057	2.90117
	1.00461	3.93574	2.65118	5.08637	1.47083	2.88113
	0.985463	4.20327	2.52562	4.5564	1.4966	2.89896
	1.01	3.9966	2.65118	5.09965	1.45122	2.89133
	1.00453	4.02723	2.57936	4.85531	1.47219	2.89879
	1.00121	4.1975	2.58995	4.24906	1.02413	2.13283
	1.00231	4.19143	2.54004	4.7687	1.40818	2.78937
	0.996479	4.184	2.52089	4.29885	1.15811	2.26826
Mean	1	4.08181	2.56967	4.7165	1.3804	2.73146
Std Dev	0.0077352	0.176331	0.0520019	0.320432	0.169772	0.305191
	Gene expression
Gene	Condition
hsrA	Control	Palmitic	Stearic	Oleic	Linoleic	Linolenic
	1.00691	2.28142	1.30128	6.10474	1.10952	1.86598
	0.986185	2.28142	1.08668	6.0207	1.10952	1.93178
	1.00691	2.21903	1.10952	5.61751	1.04967	1.72899
	1.00623	2.2866	1.30656	6.03266	1.10212	1.90001
	1.02132	2.22365	1.1132	6.02146	1.11033	1.90326
	0.972452	2.25842	1.18345	5.19429	1.02624	1.866
	1.17541	2.30371	1.1988	5.83189	1.08457	1.87162
	1.06821	2.26489	1.18564	5.3263	1.03375	1.86681
	0.756385	2.30166	1.08367	5.35102	1.03605	1.86056
Mean	1	2.26898	1.17431	5.72229	1.07353	1.86611
Std Dev	0.10972	0.0307649	0.0853299	0.356647	0.0365307	0.0566843
	Gene expression
Gene	Condition
hup	Control	Palmitic	Stearic	Oleic	Linoleic	Linolenic
	1.38556	12.1297	2.29815	9.78434	3.78548	2.7904
	0.784842	10.1294	2.25086	9.38577	4.11381	2.28228
	0.829592	10.3422	2.25086	8.28484	3.34145	1.69405
	1.32232	11.9357	2.22236	9.85552	3.23665	2.88855
	0.953215	9.23655	2.29865	9.21965	4.23265	2.01236
	0.724465	10.7547	2.26353	9.80025	3.16285	2.47113
	1.28495	10.1092	2.29822	9.59848	3.64548	2.35646
	0.674339	10.6625	2.26895	9.41841	3.42352	2.41778
	1.04071	10.9643	2.27894	9.51112	3.61774	2.3874
Mean	1	10.696	2.27006	9.42871	3.61774	2.36671
Std Dev	0.272695	0.907573	0.0263044	0.479111	0.374051	0.362464
	Gene expression
Gene	Condition
crdR	Control	Palmitic	Stearic	Oleic	Linoleic	Linolenic
	0.950021	4.48787	1.9945	25.7416	5.92178	8.97574
	0.943458	5.1196	2.22844	24.8648	3.96146	4.94521
	1.10652	4.21645	2.43856	28.3648	5.08423	5.84025
	0.952323	4.59231	2.03216	28.5363	5.23666	6.32636
	0.923232	5.09966	2.22132	25.0327	5.73233	9.23699
	1.12445	4.70318	2.89298	27.1872	6.00023	7.93052
	1.10329	4.35388	2.33081	27.6377	5.17917	7.76644
	0.902379	4.65327	2.30554	27.5436	6.30227	7.28879
	0.994336	4.3231	2.27978	26.8552	5.73637	7.50229
Mean	1	4.61659	2.30268	26.8627	5.46161	7.31251
Std Dev	0.0872671	0.321644	0.26185	1.36126	0.696474	1.40707

## Sheet: RAW DATA IL-8 
	Control	Palmitic	Stearic	Oleic	Linoleic	Linolenic
IL-8 pg/ml	57.57	174.04	33.92	60.66	32.13	33.15
	30.3	153.42	30.16	49.85	41.07	36.35
	28.28	190.21	26.42	26.32	18.64	17.18
	35.87	169.71	26.99	54.23	25.17	26.21
	39.81	172.97	24.77	53.06	42.88	23.95
	42.78	126.84	29.15	50.12	27.51	34.83
	29.88	154.98	29.98	29.02	32.56	30.21
	30.21	155.78	30.78	28.21	32.21	31.78
	31.01	157.81	30.21	25.55	20.21	33.82

## Sheet: RAW DATA MOTILITY
	Control	Palmitic	Stearic	Oleic	Linoleic	Linolenic
Motility	10	15	8	10	11	11
Diameter (mm)	11	14	13	9	10	12
	13	18	10	13	12	10
	7	17	10	10	9	10
	11	12	11	7	9	9
	8	15	9	8	10	10
	13	14	7	8	8	9
	9	17	8	10	9	8
	7	16	10	12	10	10

## Sheet: RAW DATA ADHERENCE
	Control	Palmitic	Stearic	Oleic	Linoleic	Linolenic
Adherence	70000	300000	100000	330000	90000	100000
CFU/ml	100000	320000	70000	290000	80000	90000
	130000	350000	130000	330000	100000	100000
	90000	450000	50000	320000	90000	90000
	100000	220000	90000	370000	110000	100000
	170000	270000	110000	270000	100000	110000
	140000	390000	120000	280000	90000	130000
	50000	240000	140000	290000	80000	70000
	70000	220000	90000	300000	70000	80000

## Sheet: RAW DATA BIOFILM
	Control	Palmitic	Stearic	Oleic	Linoleic	Linolenic
Biofilm	70000	300000	100000	330000	90000	100000
Crystal violet	100000	320000	70000	290000	80000	90000
uptake	130000	350000	130000	330000	100000	100000
OD600 nm	90000	450000	50000	320000	90000	90000
	100000	220000	90000	370000	110000	100000
	170000	270000	110000	270000	100000	110000
	140000	390000	120000	280000	90000	130000
	50000	240000	140000	290000	80000	70000
	70000	220000	90000	300000	70000	80000
